# Supplementary material for: Downregulated Ferroptosis-Related Gene STEAP3 as a Novel Diagnostic and Prognostic Target for Hepatocellular Carcinoma and Its Roles in Immune Regulation
Source: Front Cell Dev Biol. 2021 Nov 1;9:743046. doi: 10.3389/fcell.2021.743046 (PMC8591264; doi:10.3389/fcell.2021.743046)
Supplement: Supplementary file 8 [file Data_Sheet_1.XLSX]

## Sheet: Sheet1
		Time(H)	Blank						delete-blank					FC					T-test
Huh7	control	0	0.175	0.618	0.636	0.595	0.627	0.63	0.443	0.461	0.42	0.452	0.455	1	1.04063	0.948081	1.02032	1.02709
		24		0.677	0.696	0.73	0.812	0.633	0.502	0.521	0.555	0.637	0.458	1.13318	1.17607	1.25282	1.43792	1.03386
		48		0.81	0.886	0.977	0.96	0.903	0.635	0.711	0.802	0.785	0.728	1.43341	1.60497	1.81038	1.77201	1.64334
		72		1.073	1.111	1.313	1.299	1.021	0.898	0.936	1.138	1.124	0.846	2.02709	2.11287	2.56885	2.53725	1.90971
	OE	0		0.636	0.636	0.699	0.583	0.642	0.461	0.461	0.524	0.408	0.467	1.04063	1.04063	1.18284	0.920993	1.05418
		24		0.612	0.607	0.594	0.502	0.554	0.437	0.432	0.419	0.327	0.379	0.986456	0.975169	0.945824	0.738149	0.85553
		48		0.511	0.483	0.433	0.321	0.527	0.336	0.308	0.258	0.146	0.352	0.758465	0.69526	0.582393	0.329571	0.794582	0.00179383
		72		0.332	0.401	0.301	0.261	0.331	0.157	0.226	0.126	0.086	0.156	0.354402	0.510158	0.284424	0.194131	0.352144	0.000400257
MHCC97H	control	1		0.615	0.6	0.606	0.618	0.603	0.44	0.425	0.431	0.443	0.428	1	0.965909	0.979545	1.00682	0.972727
		2		0.666	0.76	0.633	0.603	0.633	0.491	0.585	0.458	0.428	0.458	1.11591	1.32955	1.04091	0.972727	1.04091
		3		0.819	0.813	0.733	0.811	0.684	0.644	0.638	0.558	0.636	0.509	1.46364	1.45	1.26818	1.44545	1.15682
		4		0.849	0.988	0.898	1.081	1.114	0.674	0.813	0.723	0.906	0.939	1.53182	1.84773	1.64318	2.05909	2.13409
	OE	1		0.669	0.639	0.663	0.59	0.61	0.494	0.464	0.488	0.415	0.435	1.12273	1.05455	1.10909	0.943182	0.988636
		2		0.631	0.65	0.644	0.69	0.6	0.456	0.475	0.469	0.515	0.425	1.03636	1.07955	1.06591	1.17045	0.965909
		3		0.522	0.491	0.493	0.588	0.4	0.347	0.316	0.318	0.413	0.225	0.788636	0.718182	0.722727	0.938636	0.511364	0.000116882
		4		0.241	0.312	0.298	0.412	0.211	0.066	0.137	0.123	0.237	0.036	0.15	0.311364	0.279545	0.538636	0.0818182	0.000233131

## Sheet: Sheet2
	0.206	0.212	0.199	0.209	0.21							0
	0.219	0.232	0.21	0.204	0.211							0
	0.23	0.262	0.228	0.22	0.231							0
	0.291	0.337	0.272	0.285	0.273							0
												0
												0
	0.212	0.212	0.208	0.2	0.214							0
	0.204	0.203	0.206	0.194	0.208							0
	0.337	0.361	0.311	0.307	0.309							0
	0.444	0.497	0.419	0.487	0.477							0
												0
	0.205	0.2	0.202	0.206	0.201							0
	0.222	0.22	0.211	0.221	0.211							0
	0.273	0.271	0.311	0.265	0.228							0
	0.303	0.427	0.356	0.327	0.338							0
												0
												0
	0.223	0.213	0.221	0.23	0.22							0
	0.268	0.25	0.259	0.265	0.256							0
	0.374	0.297	0.331	0.341	0.356							0
	0.647	0.576	0.598	0.621	0.642							0
