# Supplementary material for: Downregulated Ferroptosis-Related Gene STEAP3 as a Novel Diagnostic and Prognostic Target for Hepatocellular Carcinoma and Its Roles in Immune Regulation
Source: Front Cell Dev Biol. 2021 Nov 1;9:743046. doi: 10.3389/fcell.2021.743046 (PMC8591264; doi:10.3389/fcell.2021.743046)
Supplement: Supplementary file 9 [file Data_Sheet_2.XLSX]

## Sheet: 0
	Well	Fluor	Target	Content	Sample	Biological Set Name	Cq	Cq Mean	Cq Std. Dev	Starting Quantity (SQ)	Log Starting Quantity	SQ Mean	SQ Std. Dev	Set Point	Well Note	ΔCq	ΔΔCq	2-ΔΔCq
	H09	SYBR	Actin	Unkn	HHL-5		11.3387	11.3387	0				0	60
	H08	SYBR	Actin	Unkn	HHL-5		11.9827	11.9827	0				0	60
	H07	SYBR	Actin	Unkn	HHL-5		11.3279	11.3279	0				0	60
	H01	SYBR	Actin	Unkn	Huh7		12.9879	12.9879	0				0	60
	H02	SYBR	Actin	Unkn	Huh7		11.3212	11.3212	0				0	60
	H03	SYBR	Actin	Unkn	Huh7		12.983	12.983	0				0	60
	H05	SYBR	Actin	Unkn	MHCC97H		12.8726	12.8726	0				0	60
	H06	SYBR	Actin	Unkn	MHCC97H		12.8881	12.8881	0				0	60
	H04	SYBR	Actin	Unkn	MHCC97H		11.9083	11.9083	0				0	60
	A03	SYBR	STEAP3	Unkn	HHL-5		34.7218	34.7218	0				0	60		23.3831	0.00309256	1.00215
	B03	SYBR	STEAP3	Unkn	HHL-5		35.6729	35.6729	0				0	60		23.6902	0.310178	1.23986
	C03	SYBR	STEAP3	Unkn	HHL-5		34.891	34.891	0				0	60		23.5631	0.183089	1.13531
	B01	SYBR	STEAP3	Unkn	Huh7		32.319	32.319	0				0	60		19.3311	-4.0489	0.0604171
	C01	SYBR	STEAP3	Unkn	Huh7		31.3422	31.3422	0				0	60		20.021	-3.35905	0.0974599
	A01	SYBR	STEAP3	Unkn	Huh7		30.7827	30.7827	0				0	60		17.7997	-5.58026	0.0209014
	A02	SYBR	STEAP3	Unkn	MHCC97H		34.3378	34.3378	0				0	60		21.4652	-1.91479	0.265211
	C02	SYBR	STEAP3	Unkn	MHCC97H		33.0003	33.0003	0				0	60		20.1122	-3.26781	0.103822
	B02	SYBR	STEAP3	Unkn	MHCC97H		33.0022	33.0022	0				0	60		21.0939	-2.28607	0.205033

## Sheet: Run Information
File Name	admin_2021-06-25 19-50-50_CT001263.pcrd
Created By User	admin
Notes
ID
Run Started	2021/6/25 19:51:00 UTC +08:00
Run Ended	2021/6/25 20:50:51 UTC +08:00
Sample Vol	20
Lid Temp	105
Protocol File Name	2021/6/25 prcl
Plate Setup File Name	Quick Plate_96 wells_SYBR Only.pltd
Base Serial Number	CT001263
Optical Head Serial Number	785BR6577
CFX Manager Version	3.1.1517.0823.
